# Supplementary material for: Acute effects of ambient air pollution on lower respiratory infections in Guangzhou children of China
Source: Research Square preprint supplement (doi:10.21203/rs.3.rs-350683/v1), 2021-04-02
Supplement: Supplementary file 1 [file 7cfdedc6a8401e628f6d96d2.docx]

Table A3. RR for an IQR increase in the two-day moving average of ambient air pollution concentrations and children pneumonia hospital admissions

| **Outcome by pollutant** | **All ages (0-17)** | | | **< 1 Year of Age** | | | **1-5 Years Old** | | | **6-17 Years Old** | | |
| --- | --- | --- | --- | --- | --- | --- | --- | --- | --- | --- | --- | --- |
| **RR** | **95% CI** | | **RR** | **95% CI** | | **RR** | **95% CI** | | **RR** | **95% CI** | |
| **Lower** | **Upper** | **Lower** | **Upper** | **Lower** | **Upper** | **Lower** | **Upper** |
| PM2.5 | 0.96 | 0.92 | 1.03 | 0.96 | 0.90 | 1.02 | 1.00 | 0.91 | 1.10 | 1.00 | 0.87 | 1.16 |
| PM10 | 0.99 | 0.93 | 1.05 | 0.98 | 0.92 | 1.04 | 1.01 | 0.93 | 1.11 | 0.98 | 0.85 | 1.13 |
| SO2 | 1.00 | 0.95 | 1.06 | 0.98 | 0.93 | 1.04 | 1.00 | 0.92 | 1.08 | 1.12 | 0.97 | 1.29 |
| NO2 | 1.05 | 0.99 | 1.12 | 1.04 | 0.97 | 1.11 | 1.03 | 0.94 | 1.14 | 1.05 | 0.89 | 1.23 |
| CO | 1.01 | 0.96 | 1.07 | 0.99 | 0.93 | 1.05 | 1.06 | 0.98 | 1.14 | 1.05 | 0.91 | 1.21 |
| O3 | 1.01 | 0.93 | 1.08 | 1.01 | 0.94 | 1.09 | 0.98 | 0.89 | 1.07 | 0.88 | 0.73 | 1.07 |

Interquartile range: PM2.5: 27.21 µg/m3, PM10: 37.29 µg/m3, SO2: 6.5 µg/m3, NO2: 28.42 µg/m3, CO: 279.1 µg/m3, O3: 35.75 µg/m3

Abbreviation: RR: Risk ratio; CI: Confidence Interval

Risk ratio (RR) estimated from Quasi-Poisson regression models, adjusting for secular trends and seasonal variation, day of the week, holiday, influenza epidemic, and meteorological factors including temperature, relative humidity, pressure, horizontal visibility, precipitation and wind speed average.
